# Supplementary material
Source: PubMed Central journal article supplement (PMC6272062)
Supplement: NIHMS997634-supplement-SI.pdf [file NIHMS997634-supplement-SI.pdf]

# Driving protein conformational changes with light: Photoinduced structural rearrangement in a heterobimetallic oxidase

Pearson T. Maugeri<sup>a</sup>, Julia J. Griese<sup>d,†</sup>, Rui M. Branca<sup>e</sup>, Effie K. Miller<sup>b</sup>, Zachary R. Smith<sup>c</sup>,  
Jürgen Eirich<sup>e</sup>, Martin Högbom<sup>\*d</sup>, Hannah S. Shafaat<sup>\*a,b,c</sup>

<sup>a</sup>*Biophysics Graduate Program, The Ohio State University, Columbus, OH 43210, USA*

<sup>b</sup>*Ohio State Biochemistry Program, The Ohio State University, Columbus, OH 43210, USA*

<sup>c</sup>*Department of Chemistry and Biochemistry, The Ohio State University, Columbus, OH 43210, USA*

<sup>d</sup>*Department of Biochemistry and Biophysics, Stockholm University, SE-106 91 Stockholm, Sweden*

<sup>e</sup>*Department of Oncology–Pathology, Science for Life Laboratory, Karolinska Institutet, SE-17165 Stockholm, Sweden*

## Supporting Information

## Table of Contents

|                                                                                                     |     |
|-----------------------------------------------------------------------------------------------------|-----|
| <b>Figure S1</b> – SDS-PAGE of R2lox-----                                                           | S3  |
| <b>Figure S2</b> – Quantum yield sample data and calculations-----                                  | S4  |
| <b>Table S1</b> – Crystallographic data statistics-----                                             | S5  |
| <b>Table S2</b> – Crystallographic refinement statistics-----                                       | S6  |
| <b>Figure S3</b> – Optical spectra of freshly metallated and dark-adapted R2lox-----                | S7  |
| <b>Figure S4</b> – Deuterium isotope exchange RR spectra and RR excitation profiles<br>(RREPs)----- | S8  |
| <b>Table S3</b> – Representative extinction coefficients of purple acid phosphatases -----          | S9  |
| <b>Figure S5</b> – RR spectra of H <sub>2</sub> <sup>18</sup> O isotope exchange experiments-----   | S10 |
| <b>Table S4</b> – Photoconversion quantum efficiencies of R2lox variants-----                       | S11 |
| <b>Figure S6</b> – Absorption spectra of Y→F mutants before and after irradiation-----              | S12 |
| <b>Figure S7</b> – EPR spectra of Y162F Mn/Fe R2lox before and after irradiation-----               | S13 |
| <b>Figure S8</b> – Resonance Raman spectra of <sup>18</sup> O-labeled Y162F Fe/Fe R2lox-----        | S14 |
| <b>Figure S9</b> – M/S spectral annotation-----                                                     | S15 |
| <b>Figure S10</b> – Scheme for photoconversion of crosslink mutants -----                           | S16 |
| <b>Supplemental References</b> -----                                                                | S17 |

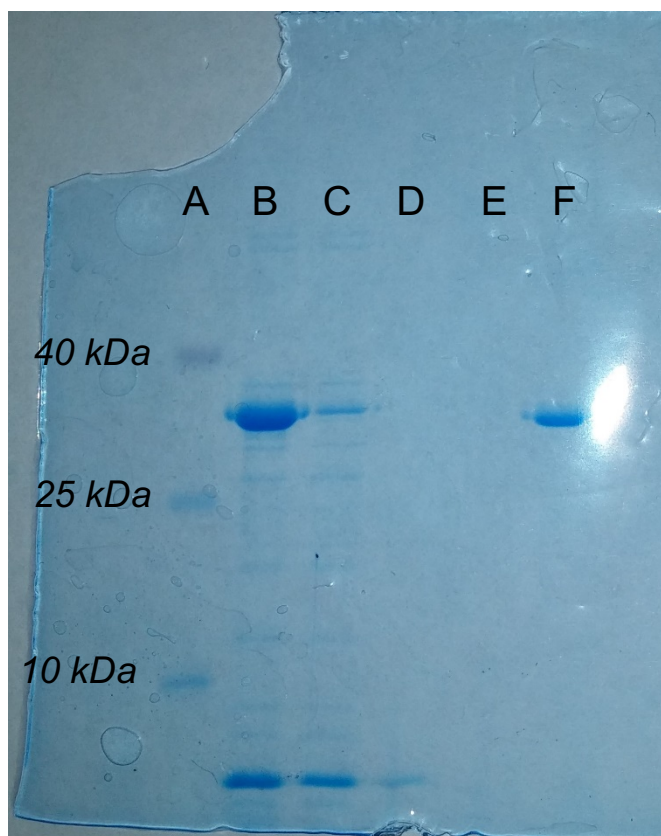

| Lane | Sample                                                                           |
|------|----------------------------------------------------------------------------------|
| A    | Protein Ladder (Spectra Multicolor Low Range, ThermoFisher Scientific)           |
| B    | Cell lysate                                                                      |
| C    | Column load flow through                                                         |
| D    | Wash 1 with 25 mM HEPES, 40 mM imidazole, 300 mM NaCl, and 0.5 mM EDTA at pH 7.0 |
| E    | Wash 2 with 25 mM HEPES, 40 mM imidazole, and 300 mM NaCl at pH 7.0              |
| F    | Elution with 25 mM HEPES, 250 mM imidazole, and 300 mM NaCl at pH 7.0            |

**Figure S1.** Representative SDS-PAGE indicating R2lox expression and purification. Lanes are labeled as given in table.

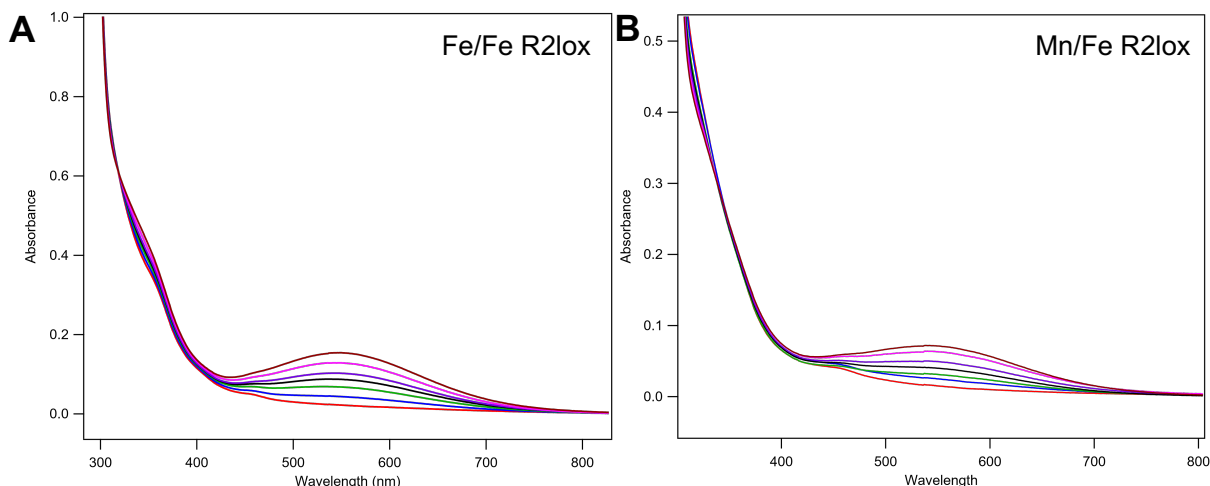

**Figure S2.** Representative spectra of photoconversion efficiency measurements for (A) Fe/Fe and (B) Mn/Fe R2lox showing spectral changes as a function of photolysis time from 0 min (red trace) – 30 min (brown trace).

Sample equations explaining how the quantum yield was calculated in this work.<sup>1,2</sup>

$$I = \frac{A_{510}v_2v_3}{\epsilon_{510}\Phi_{402}v_1dt}$$

$I$  = photon flux (einsteins/sec)

$A$  = absorbance of  $\text{Fe}^{\text{II}}(\text{phen})_3^{2+}$  at 510 nm

$v_2$  = volume of ferrioxalate solution irradiated (L)

$v_3$  = volume of total solution after adding ferrioxalate (mL)

$\epsilon$  = molar extinction coefficient of  $\text{Fe}^{\text{II}}(\text{phen})_3^{2+}$  at 510 nm ( $1.1 \times 10^4 \text{ M}^{-1}\text{cm}^{-1}$ )

$\Phi$  = quantum yield of ferrioxalate  $\text{Fe}^{\text{III}}$  to  $\text{Fe}^{\text{II}}$  conversion (1.07 at 402 nm)

$v_1$  = volume of 1,10-phenanthroline solution added (mL)

$d$  = path length of cuvette (1 cm)

$t$  = time that ferrioxalate is irradiated (sec)

$$\Phi_{protein} = \frac{1}{f_m I} \frac{d[\text{photoproduct}]}{dt}$$

$$f_m = \frac{(1 - 10^{-A_{402,i}}) + (1 - 10^{-A_{402,f}})}{2}$$

$f_m$  = fraction of molecules that absorb light

$A_{402,i}$  = absorbance at 402 nm of initial spectrum

$A_{402,f}$  = absorbance at 402 nm of final spectrum

**Table S1.** Crystallographic statistics for dark and photoconverted Fe/Fe R2lox.

| <b>State</b>                     | <b>dark state</b>      | <b>photoconverted</b>  |
|----------------------------------|------------------------|------------------------|
| Beamline                         | X06DA/SLS              | X06DA/SLS              |
| Wavelength (Å)                   | 1.00                   | 1.00                   |
| Resolution range (Å)             | 50.00-1.70 (1.81-1.70) | 50.00-2.00 (2.13-2.00) |
| Space group                      | I222                   | I222                   |
| Unit cell dimensions a, b, c (Å) | 55.67,96.62, 128.40    | 55.63, 97.31, 127.98   |
| Unique reflections               | 38162 (6063)           | 23693 (3747)           |
| Multiplicity                     | 6.6                    | 6.6                    |
| Completeness (%)                 | 99.8 (99.0)            | 99.8 (98.9)            |
| I/σ(I)                           | 12.00 (0.55)           | 11.37 (0.77)           |
| R <sub>merge</sub> (%)           | 11.3 (307.7)           | 13.7 (232.5)           |
| R <sub>meas</sub> (%)            | 12.3 (335.3)           | 14.9 (252.0)           |
| CC <sub>1/2</sub> <sup>§</sup>   | 99.9 (12.1)            | 99.9 (32.3)            |

Values in parentheses are for the highest resolution shell. Friedel pairs were merged.  
§Percentage of correlation between intensities from random half-datasets.<sup>3</sup> The correlation is significant at the 0.1% level in all resolution shells in all datasets.

**Table S2.** Refinement statistics for crystal structures of dark and photoconverted Fe/Fe R2lox.

| State                                                       | dark state   | photoconverted |
|-------------------------------------------------------------|--------------|----------------|
| PDB ID                                                      | 5OMK         | 5OMJ           |
| Resolution range (Å)                                        | 48.31-1.70   | 48.66-2.01     |
| Reflections used                                            | 38157        | 23651          |
| $R_{\text{work}}/R_{\text{free}}$ (%) <sup>†</sup>          | 17.8/20.9    | 20.2/26.4      |
| Coordinate error (Å)                                        | 0.28         | 0.43           |
| Non-H atoms                                                 | 2486         | 2430           |
| Protein residues <sup>‡</sup>                               | 285 (2-286)  | 285 (2-286)    |
| Water molecules                                             | 101          | 52             |
| Ligand molecules                                            | 1            | 1              |
| Metal ions                                                  | 2            | 2              |
| rmsd bonds (Å) <sup>¶</sup>                                 | 0.013        | 0.017          |
| rmsd angles (°) <sup>¶</sup>                                | 1.075        | 1.187          |
| Ramachandran favored/allowed/ outliers (%) <sup>  </sup>    | 98.2/1.4/0.4 | 94.6/5.4/0.0   |
| Clashscore <sup>  </sup>                                    | 2.07         | 5.94           |
| Wilson <i>B</i> factor (Å <sup>2</sup> )                    | 34.1         | 43.9           |
| Average <i>B</i> factors (Å <sup>2</sup> ) <sup>&amp;</sup> |              |                |
| all atoms                                                   | 46.4         | 61.5           |
| protein main and side chains                                | 46.4         | 61.7           |
| site 1 Fe ion                                               | 30.0         | 40.0           |
| site 2 Fe ion                                               | 30.6         | 43.0           |
| ligand                                                      | 49.3         | 59.7           |
| water                                                       | 44.8         | 45.3           |

<sup>†</sup> $R_{\text{free}}$  is calculated from a randomly selected subset of ~2000 reflections (corresponding to ≤5% of reflections) excluded from refinement. <sup>‡</sup>Residues out of the 302 residue full-length protein included in the final model are given in parentheses. <sup>¶</sup>Root-mean-square deviation from ideal geometry. <sup>||</sup>Geometry statistics were calculated with MolProbity.<sup>4</sup> <sup>&</sup>Average *B* factors were calculated with  $B_{\text{average}}$  in the CCP4 suite.<sup>5</sup>

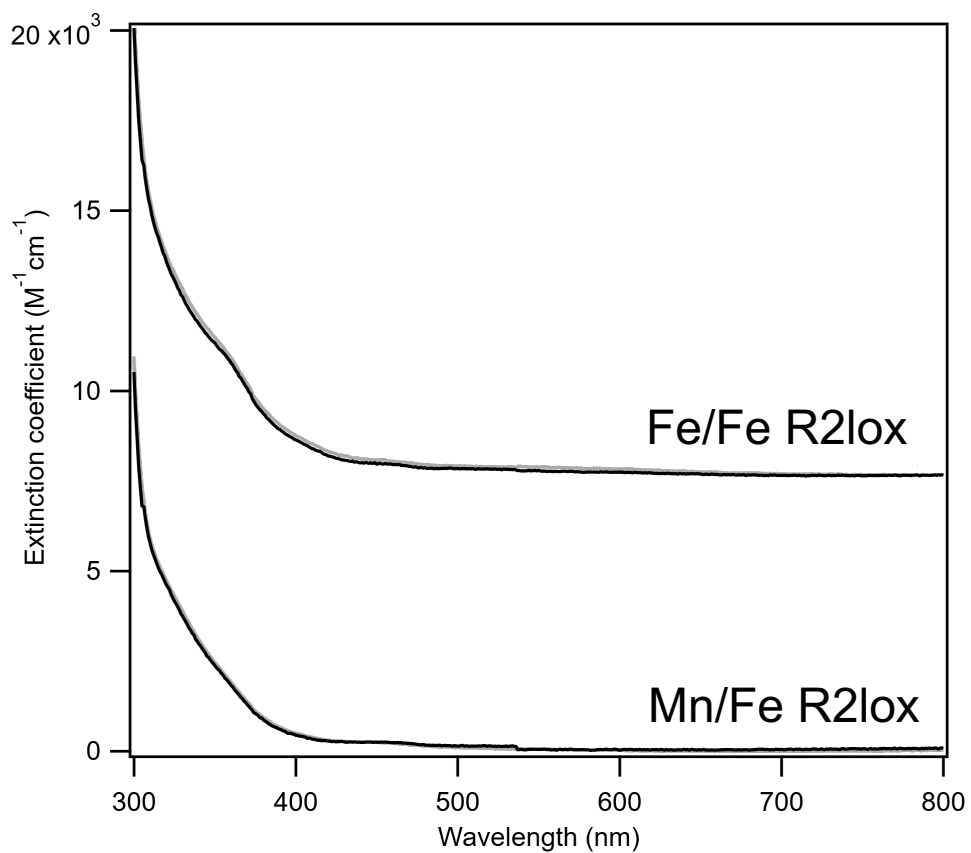

**Figure S3.** Photoconversion control experiments showing (*top*) WT Fe/Fe and (*bottom*) Mn/Fe R2lox immediately following reconstitution (black) and after 30 days in the dark (grey).

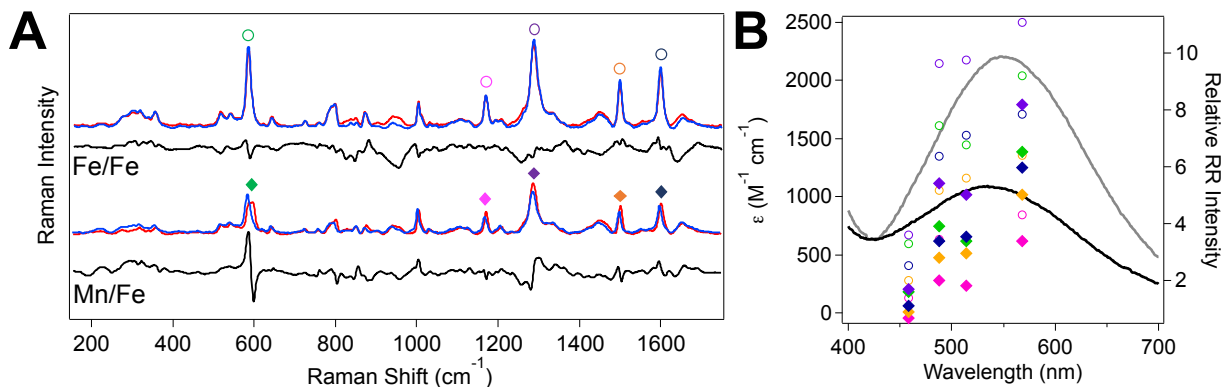

**Figure S4.** (A) Resonance Raman spectra of photoconverted Fe/Fe (top) and Mn/Fe (bottom) R2lox ( $\lambda_{\text{ex}} = 457.9$  nm,  $P_{\text{ex}} = 25$  mW,  $T = 298$  K) prepared in H<sub>2</sub>O (blue) and D<sub>2</sub>O (red) buffers. Black traces show the isotopic difference spectra (H<sub>2</sub>O-D<sub>2</sub>O). (B) Resonance Raman excitation profiles for key vibrational modes overlaid with the absorption spectra of photoconverted Fe/Fe (grey) and Mn/Fe (black) R2lox. The bands represented in the resonance Raman excitation profiles are tagged in the RR spectra with the respective symbols.



**Table S3.** Extinction coefficients of various purple acid phosphatases.

| <b>Species of origin</b>                    | <b>Metal centers</b>                 | $\lambda_{\text{max}}$ (nm) | <b>Extinction coefficient (<math>\text{M}^{-1} \text{cm}^{-1}</math>)</b> |
|---------------------------------------------|--------------------------------------|-----------------------------|---------------------------------------------------------------------------|
| <i>Sus scrofa</i> (pig)                     | Fe <sup>III</sup> /Fe <sup>III</sup> | 545 <sup>6</sup>            | 3100 <sup>6</sup>                                                         |
| <i>Phaseolus vulgaris</i> (red kidney bean) | Fe <sup>III</sup> /Zn <sup>II</sup>  | 560 <sup>7</sup>            | 3360 <sup>7</sup>                                                         |
| <i>Ipomoea batatas</i> (sweet potato)       | Fe <sup>III</sup> /Mn <sup>II</sup>  | 560 <sup>8</sup>            | 3207 <sup>8</sup>                                                         |

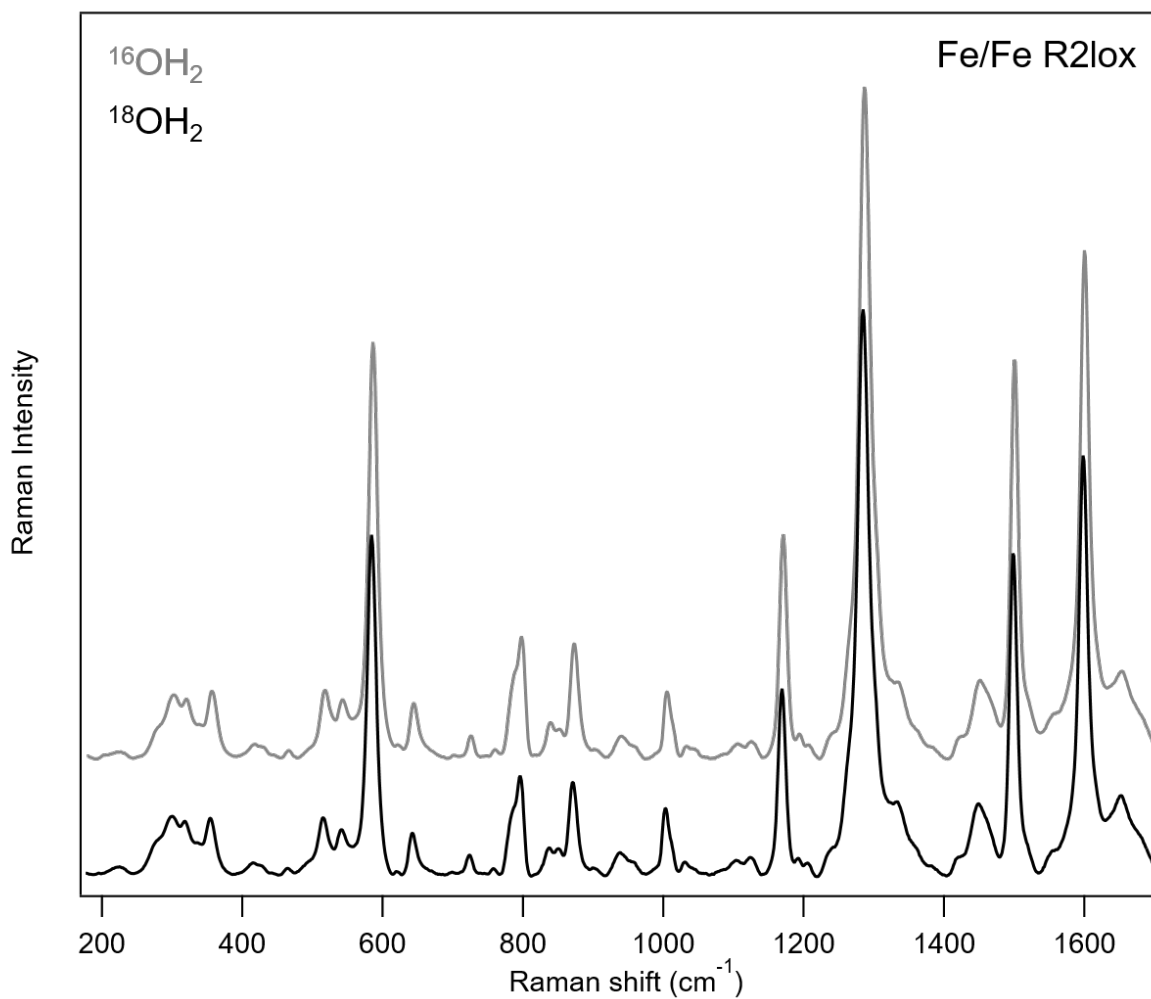

**Figure S5.** Resonance Raman spectra of photoconverted WT Fe/Fe R2lox prepared in natural abundance H<sub>2</sub><sup>16</sup>O buffer (grey) and exchanged into H<sub>2</sub><sup>18</sup>O buffer (black) prior to photolysis (RR  $\lambda_{\text{ex}}$  = 457.9 nm, P = 25 mW, T = 298 K).

**Table S4.** Quantum yields for photoconversion of R2lox mutants.

|              | <i>WT</i>       | <i>V72A</i>     | <i>V72L</i>     | <i>V72I</i>     | <i>Y175F</i>    | <i>Y162F</i> |
|--------------|-----------------|-----------------|-----------------|-----------------|-----------------|--------------|
| <b>Mn/Fe</b> | 3.1% ±<br>0.26% | 3.4% ±<br>1.3%  | 3.6% ±<br>0.18% | 7.2% ±<br>0.94% | 1.5% ±<br>0.22% | 0%           |
| <b>Fe/Fe</b> | 2.3% ±<br>0.09% | 2.9% ±<br>0.38% | 2.7% ±<br>0.21% | 3.1% ±<br>0.27% | 2.0% ±<br>0.22% | 0%           |

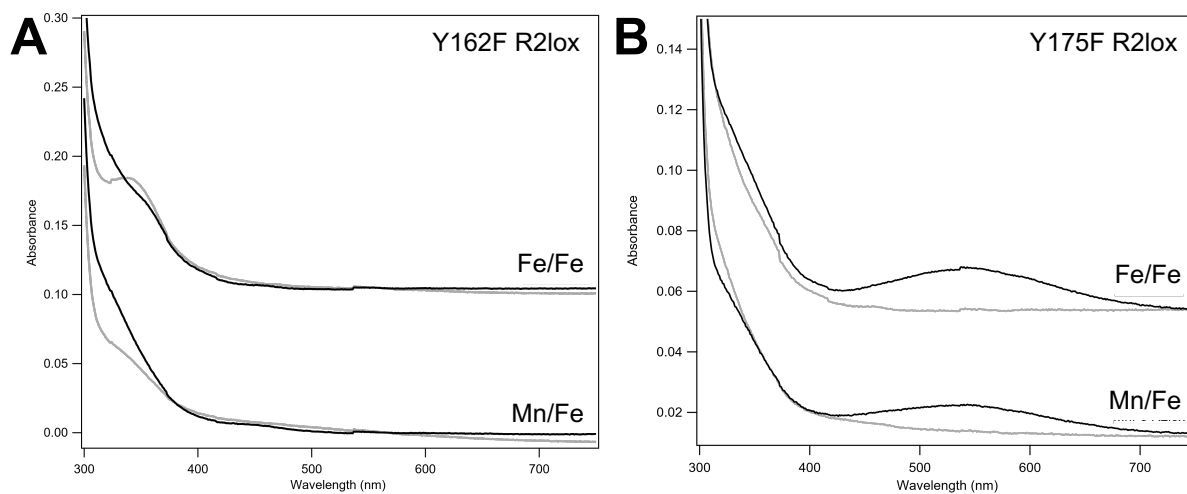

**Figure S6.** Absorption spectra of 20  $\mu\text{M}$  (A) Y162F and (B) Y175F R2lox variants prior to photolysis (grey) and after irradiation (black).

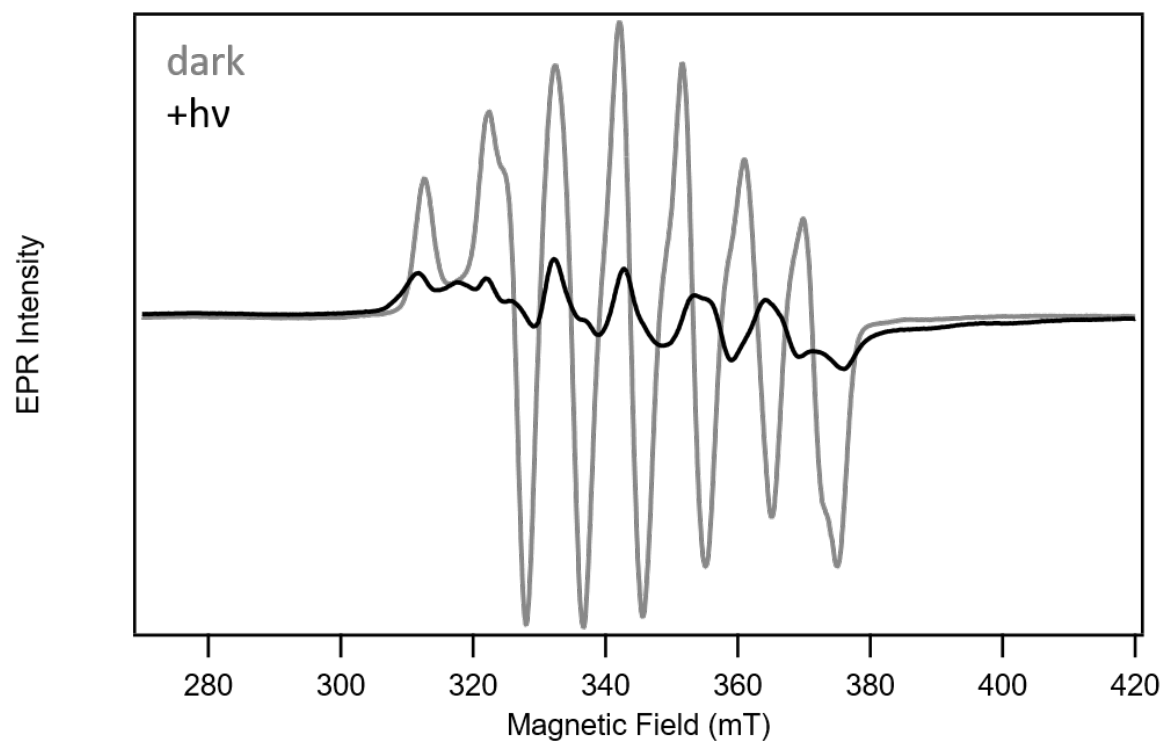

**Figure S7.** CW X-band EPR spectra ( $T = 5$  K) of Y162F Mn/Fe R2lox prior to (grey) and following (black) irradiation.

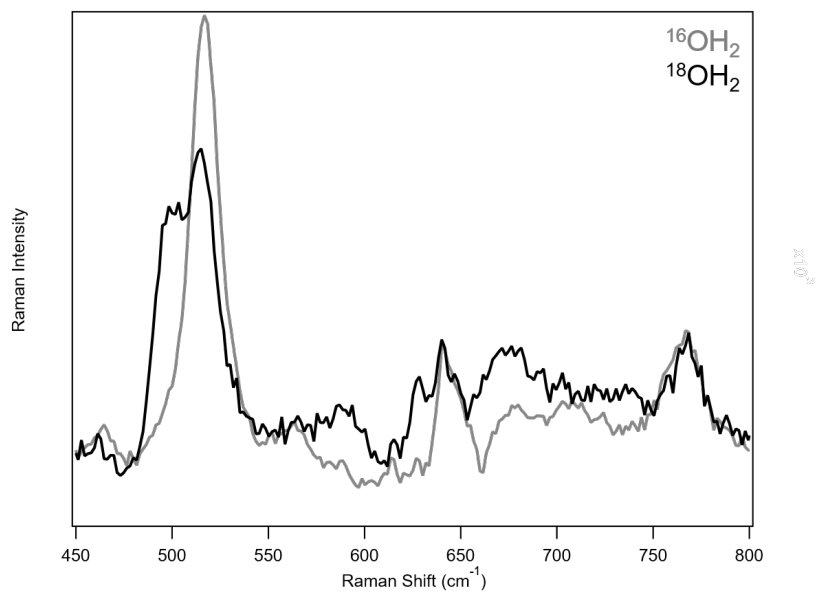

**Figure S8.** The resonance Raman spectrum of Y162F Fe/Fe R2lox in buffer prepared with natural abundance (H<sub>2</sub><sup>16</sup>O, grey) and H<sub>2</sub><sup>18</sup>O-enriched (black) water ( $\lambda_{\text{ex}} = 407 \text{ nm}$ ,  $P = 10 \text{ mW}$ ,  $T = 298 \text{ K}$ ).

# Annotated MS2 spectrum of the AVIRAATVYNMIVE(-CO<sub>2</sub>)GTLAE peptide

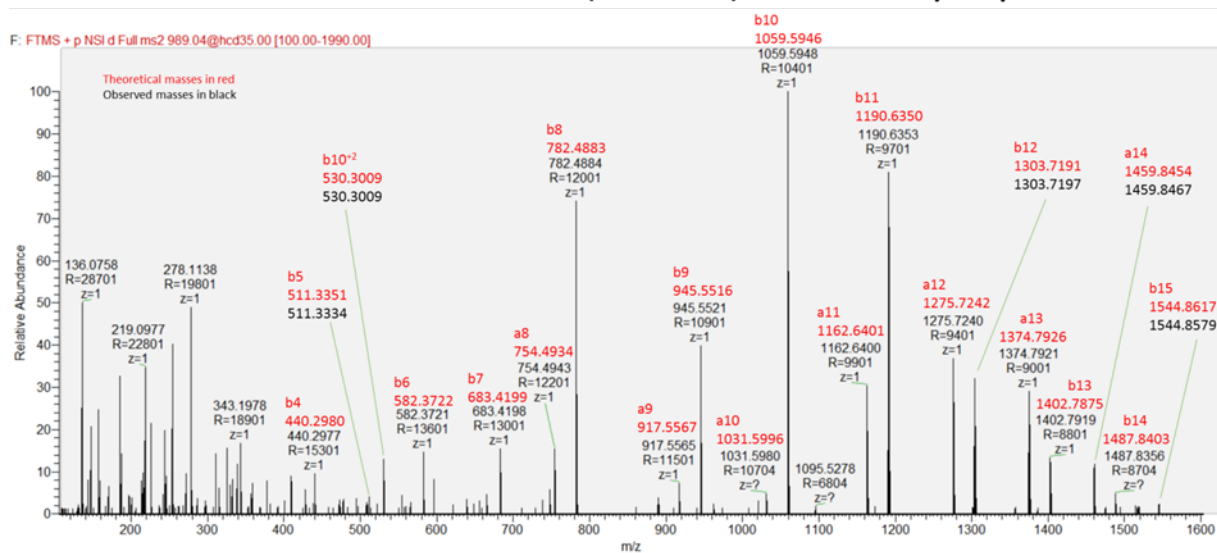

| a         | b         | N-terminal | -             | C-terminal | y         |
|-----------|-----------|------------|---------------|------------|-----------|
| ---       | ---       | 1          | A             | 19         | ---       |
| 143.1179  | 171.1128  | 2          | V             | 18         | 1906.0466 |
| 256.2020  | 284.1969  | 3          | I             | 17         | 1806.9782 |
| 412.3031  | 440.2980  | 4          | R             | 16         | 1693.8942 |
| 483.3402  | 511.3351  | 5          | A             | 15         | 1537.7931 |
| 554.3773  | 582.3722  | 6          | A             | 14         | 1466.7559 |
| 655.4250  | 683.4199  | 7          | T             | 13         | 1395.7188 |
| 754.4934  | 782.4883  | 8          | V             | 12         | 1294.6712 |
| 917.5567  | 945.5516  | 9          | Y             | 11         | 1195.6027 |
| 1031.5996 | 1059.5946 | 10         | N             | 10         | 1032.5394 |
| 1162.6401 | 1190.6350 | 11         | M             | 9          | 918.4965  |
| 1275.7242 | 1303.7191 | 12         | I             | 8          | 787.4560  |
| 1374.7926 | 1402.7875 | 13         | V             | 7          | 674.3719  |
| 1459.8454 | 1487.8403 | 14         | E(-43.989829) | 6          | 575.3035  |
| 1516.8668 | 1544.8617 | 15         | G             | 5          | 490.2508  |
| 1617.9145 | 1645.9094 | 16         | T             | 4          | 433.2293  |
| 1730.9986 | 1758.9935 | 17         | L             | 3          | 332.1816  |
| 1802.0357 | 1830.0306 | 18         | A             | 2          | 219.0975  |
| ---       | ---       | 19         | E             | 1          | 148.0604  |

**Figure S9.** Annotated MS2 fragmentation spectrum of the doubly charged precursor ion 989.0422 m/z and respective theoretical fragment ion table of the peptide AVIRAATVYNMIVE(-CO<sub>2</sub>)GTLAE with the decarboxylated glutamate residue. The peptide was obtained by proteolytic digestion with Glu-C of irradiated R2lox protein. The experimental m/z values are in black, whereas the annotation and theoretical m/z values are shown in red. The mass error is typically less than 0.01 m/z, in accordance with the high resolution used (17,500). Among the fragment ions observed, the most important are a14, b14 and b15 which demonstrate the decarboxylated glutamate residue (E167).

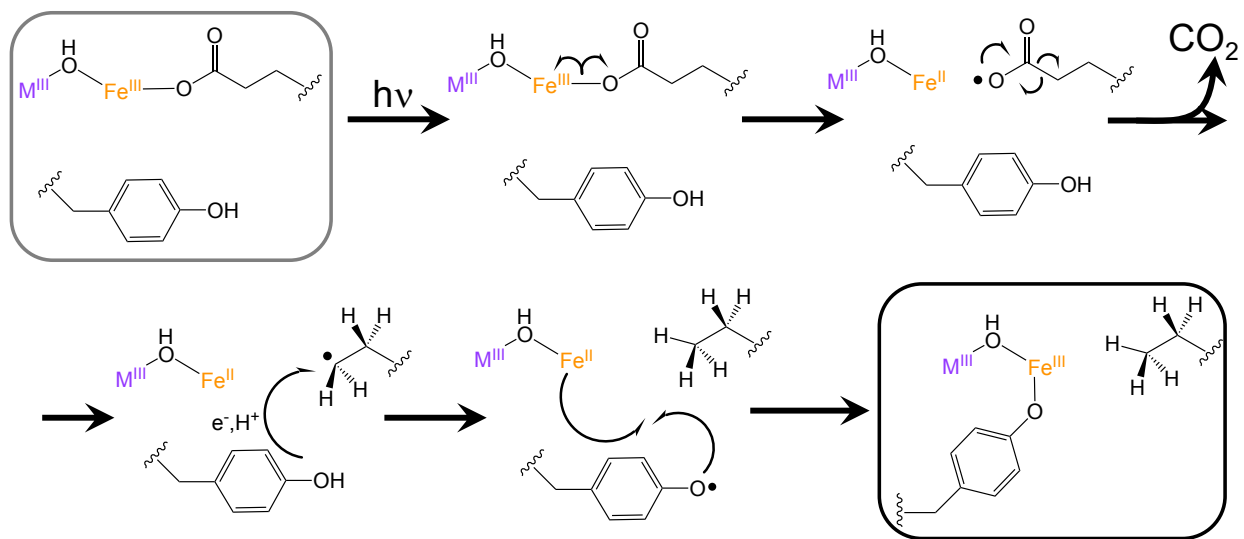

**Figure S10.** Scheme for photoconversion of R2lox variants lacking Y162-V72 crosslink.



## Supplemental References

- (1) Murov, S. L.; Carmichael, I.; Hug, G. L. *Handbook of Photochemistry, 2nd edition*, 2nd ed.; Marcel Dekker, Inc.: New York, NY, 1993.
- (2) Ma, X.; Tian, H. *Photochemistry and Photophysics. Concepts, Research, Applications*. By Vincenzo Balzani, Paola Ceroni and Alberto Juris.; Wiley-VCH Verlag: Weinheim, Germany, 2014.
- (3) Karplus, P. A.; Diederichs, K. *Science* **2012**, 336, 1030–1033.
- (4) Chen, V. B.; Arendall, W. B.; Headd, J. J.; Keedy, D. A.; Immormino, R. M.; Kapral, G. J.; Murray, L. W.; Richardson, J. S.; Richardson, D. C. *Acta Crystallogr. D Biol. Crystallogr.* **2010**, 66, 12–21.
- (5) Winn, M. D.; Ballard, C. C.; Cowtan, K. D.; Dodson, E. J.; Emsley, P.; Evans, P. R.; Keegan, R. M.; Krissinel, E. B.; Leslie, A. G. W.; McCoy, A.; McNicholas, S. J.; Murshudov, G. N.; Pannu, N. S.; Potterton, E. A.; Powell, H. R.; Read, R. J.; Vagin, A.; Wilson, K. S. *Acta Crystallogr. D Biol. Crystallogr.* **2011**, 67, 235–242.
- (6) Antanaitis, B. C.; Strekas, T.; Aisen, P. *J. Biol. Chem.* **1982**, 257, 3766–3770.
- (7) Beck, J. L.; McConachie, L. A.; Summors, A. C.; Arnold, W. N.; De Jersey, J.; Zerner, B. *Biochim. Biophys. Acta BBA - Protein Struct. Mol. Enzymol.* **1986**, 869, 61–68.
- (8) Schenk, G.; Boutchard, C. L.; Carrington, L. E.; Noble, C. J.; Moubaraki, B.; Murray, K. S.; De Jersey, J.; Hanson, G. R.; Hamilton, S. *J. Biol. Chem.* **2001**, 276, 19084–19088.
